# Supplementary material
Source: PubMed Central journal article supplement (PMC137514)
Supplement: pnas_222313099_2.pdf [file pnas_222313099_2.pdf]

**Table 1. Details on the samples used**

| Species                                           | Code   | Geographical origin    | Termite<br>COI GenBank<br>acc. no. | Origin fungal<br>sequences<br>(C=comb, G=gut,<br>B=basidio-carp | Fungus<br>nuc-lsu<br>GenBank<br>acc. no. | Fungus mt-<br>ssu<br>GenBank<br>acc. no. |
|---------------------------------------------------|--------|------------------------|------------------------------------|-----------------------------------------------------------------|------------------------------------------|------------------------------------------|
| <b>Fungus-growing Macrotermitinae</b>             |        |                        |                                    |                                                                 |                                          |                                          |
| <i>Ancistrotermes cavithorax</i><br>(Sjöstedt)    | dka46  | Kolda, 2, Senegal      | AY127715                           | G                                                               | AY127775                                 | AY127826                                 |
|                                                   | dka34  | Kolda, 1, Senegal      | AY127712                           | G                                                               | AY127774                                 | AY127825                                 |
| <i>Ancistrotermes crucifer</i><br>(Sjöstedt)      | dka138 | Nkolfoulo II, Cameroon |                                    | B, G                                                            | AY127777                                 | AY127828                                 |
|                                                   | dka140 | Nkolfoulo II, Cameroon | AY127733                           | G                                                               | AY127778                                 | AY127829                                 |
|                                                   | dka69  | Kolda, 2, Senegal      |                                    | G                                                               | AY127776                                 | AY127827                                 |
| <i>Acanthotermes acanthothorax</i><br>(Sjöstedt)  | dka120 | Mbalmayo, Cameroon     | AY127704                           | C                                                               | AY127782                                 | AY127833                                 |
|                                                   | dka136 | Nkolfoulo II, Cameroon | AY127732                           | G                                                               | AY127781                                 | AY127832                                 |
| <i>Macrotermes subhyalinus</i><br>(Rambur)        | dka5   | Thiès, Senegal         | AY127708                           | C, G                                                            | AY127760                                 | AY127753                                 |
|                                                   | dka64  | Kolda, 3, Senegal      | AY127709                           | C                                                               | AY127749                                 | AY127811                                 |
| <i>Macrotermes bellicosus</i><br>(Smeathman)      | dka19  | Kolda, 1, Senegal      | AY127702                           | C, G                                                            | AY127759                                 | AY127810                                 |
|                                                   | dka8   | Kolda, 1, Senegal      | AY127711                           | C, G                                                            | AY127762                                 | AY127813                                 |
|                                                   | dka50  | Kolda, 3, Senegal      |                                    | C                                                               | AY127754                                 | AY127806                                 |
|                                                   | dka52  | Kolda, 3, Senegal      |                                    | C                                                               | AY127758                                 | AY127809                                 |
|                                                   | dka60  | Kolda, 3, Senegal      |                                    | C                                                               | AY127755                                 | AY127805                                 |
|                                                   | dka14  | Kolda, 1, Senegal      |                                    | C                                                               | AY127763                                 | AY127814                                 |
| <i>Macrotermes nobilis</i> (Sjöstedt)             | 367569 | Franceville, Gabon     | AY127705                           | G                                                               | AY127757                                 | AY127808                                 |
| <i>Macrotermes muelleri</i> (Sjöstedt)            | 367551 | Franceville, Gabon     | AY127703                           | G                                                               | AY127756                                 | AY127807                                 |
| <i>Macrotermes lilljeborgi</i> (Sjöstedt)         | dka143 |                        | AY127734                           | –                                                               | –                                        | –                                        |
| <i>Odontotermes latericius</i> ssp1<br>(Haviland) | dka39  | Kolda, 1, Senegal      | AY127714                           | C, G                                                            | AY127794                                 | AY127752                                 |
|                                                   | dka42  | Kolda, 1, Senegal      |                                    | C                                                               | AY127795                                 | AY127752                                 |
|                                                   | dka43  | Kolda, 1, Senegal      |                                    | C                                                               | AY127785                                 | AY127836                                 |
| <i>Odontotermes latericius</i> ssp2 (Haviland)    | dka81  | Tambacounda, Senegal   | AY127716                           | G                                                               | AY127768                                 | AY127819                                 |
| <i>Odontotermes nilensis</i> (Emerson)            | dka93  | Tambacounda, Senegal   | AY127717                           | G                                                               | AY127767                                 | AY127851                                 |
| <i>Odonotermes silvicolus</i> (Roy-Noel)          | dka6   | Thiès, Senegal         | AY127710                           | C, G                                                            | AY127786                                 | AY127751                                 |
| <i>Odontotermes</i> sp.1                          | dka114 | Mbalmayo, Cameroon     | AY127730                           | C                                                               | AY127788                                 | AY127838                                 |
| <i>Odontotermes</i> sp.3                          | dka126 | Mbalmayo, Cameroon     | AY127728                           | –                                                               | –                                        | –                                        |
| <i>Odontotermes</i> sp.4                          | dka132 | Mbalmayo, Cameroon     | AY127724                           | G                                                               | AY127783                                 | AY127834                                 |
| <i>Odontotermes</i> sp.2                          | dka303 | Cameroon               | AY127746                           | –                                                               | –                                        | –                                        |
| <i>Protermes minutus</i> (Grassé)                 | 367567 | Franceville, Gabon     | AY127706                           | G                                                               | AY127766                                 | AY127817                                 |
| <i>Protermes prorepens</i> (Sjöstedt)             | dka129 | Mbalmayo, Cameroon     | AY127729                           | G                                                               | AY127765                                 | AY127816                                 |
| <i>Microtermes</i> sp. 1                          | dka3   | Thiès, Senegal         | AY127707                           | C, G                                                            | AY127769                                 | AY127820                                 |
| <i>Microtermes</i> sp. 2                          | dka38  | Kolda, 1, Senegal      | AY127713                           | G                                                               | AY127770                                 | AY127821                                 |
| <i>Microtermes</i> sp. 3                          | dka103 | Mbalmayo, Cameroon     | AY127701                           | G                                                               | AY127772                                 | AY127823                                 |
|                                                   | dka107 | Mbalmayo, Cameroon     | AY127736                           | G                                                               | AY127789                                 | AY127839                                 |
|                                                   | dka142 | Nkolfoulo II, Cameroon |                                    | G                                                               | AY127771                                 | AY127822                                 |
|                                                   | dka145 | Mbalmayo, Cameroon     |                                    | G                                                               | AY127773                                 | AY127824                                 |
|                                                   | dka146 | Mbalmayo, Cameroon     | AY127735                           | G                                                               | AY127775                                 | AY127835                                 |
| <i>Synacanthotermes heterodon</i><br>(Sjöstedt)   | dka118 | Mbalmayo, Cameroon     | AY127726                           | G                                                               | AY127779                                 | AY127830                                 |
|                                                   | dka119 | Mbalmayo, Cameroon     |                                    | G                                                               | AY127780                                 | AY127831                                 |
| <i>Pseudacanthotermes militaris</i> (Hagen)       | dka134 | Yaounde, Cameroon      | AY127731                           | G                                                               | AY127764                                 | AY127815                                 |
| Asiatic material                                  |        |                        |                                    |                                                                 |                                          |                                          |
| <i>Macrotermes ahmadi</i> (Tho)                   | pe5    | Sumatra, Indonesia     | AY127747                           | –                                                               | –                                        | –                                        |
| <i>Macrotermes malacensis</i> (Haviland)          | dka160 | Kalimantan, Indonesia  | AY127748                           | G                                                               | AY127761                                 | AY127812                                 |
| <i>Odonotermes minutus</i> (Amir)                 | dka161 | Kalimantan, Indonesia  | AY127738                           | G                                                               | AY127791                                 | AY127841                                 |

|                                             |        |                       |          |   |          |          |
|---------------------------------------------|--------|-----------------------|----------|---|----------|----------|
| <i>Odonototermes oblongatus</i>             | dka162 | Kalimantan, Indonesia | AY127739 | G | –        | –        |
| <i>Odontotermes</i> sp. 5                   | dka164 | Sri Lanka             | AY127740 | G | –        | –        |
| <i>Odontotermes javanicus</i> (Holmgren)    | dka165 | Kalimantan, Indonesia | AY127741 | G | AY127787 | AY127837 |
| <i>Hypotermes xenotermitis</i> (Wasmann)    | dka166 | Kalimantan, Indonesia | AY127742 | G | AY127790 | AY127840 |
| <i>Odontotermes sarawakensis</i> (Holmgren) | dka167 | Kalimantan, Indonesia | AY127743 | G | AY127793 | AY127843 |
| <i>Odontotermes billitoni</i> (Holmgren)    | dka168 | Kalimantan, Indonesia | AY127744 | G | AY127792 | AY127842 |

**Non-fungus-growing  
Macrotermitinae**

*Sphaerotermes sphaerotherax* (Sjöstedt) dka112 Mbalmayo, Cameroon AY127725

**Termite outgroups**

**Termitidae**

|                                             |        |                        |          |
|---------------------------------------------|--------|------------------------|----------|
| <i>Cubitermes</i> sp.                       | dka101 | Mbalmayo, Cameroon     | AY127719 |
| <i>Microcerotermes parvus</i> (Haviland)    | dka106 | Mbalmayo, Cameroon     | AY127721 |
| <i>Nasutitermes latifrons</i> (Sjöstedt)    | dka108 | Mbalmayo, Cameroon     | AY127722 |
| <i>Amalotermes phaeocephalus</i> (Sands)    | dka109 | Mbalmayo, Cameroon     | AY127723 |
| <i>Astalotermes quietus</i> (Silvestri)     | dka121 | Mbalmayo, Cameroon     | AY127727 |
| <i>Amitermes evuncifer</i> (Silvestri)      | dka97  | Niokoulo Koba, Senegal | AY127718 |
| <i>Foraminitermes valens</i> (Holmgren)     | dka159 | Southern Cameroon      | AY127737 |
| <i>Labritermes buttelreepeni</i> (Holmgren) | dka169 | Kalimantan, Indonesia  | AY127745 |

**Rhinotermitidae**

*Coptotermes sjostedti* (Holmgren) dka102 Mbalmayo, Cameroon AY127720

**Termitomyces herbarium-dried  
morphospecies**

|                       |        |                            |          |          |
|-----------------------|--------|----------------------------|----------|----------|
| <i>T. aurantiacus</i> | tgf82  | Southern Region, Tanzania  | AY127804 | AY127852 |
| <i>T. medius</i>      | dka138 | Nkolfoulo II, Cameroon     | AY127796 | AY127844 |
| <i>T. robustus</i>    | tgf95  | Burundi                    | AY127797 | AY127845 |
| <i>T. microcarpus</i> | Tgf28  | Korup, Cameroon            | AY127799 | AY127847 |
|                       | Tgf12  | Kepong, Malaysia           | AY127798 | AY127846 |
| <i>T. letestui</i>    | Tgf16  | Eastern Province, Tanzania | AY127800 | AY127848 |
| <i>T. titanicus</i>   | Tgf94  | Bujumbura, Burundi         | AY127801 | AY127849 |
| <i>T. clypeatus</i>   | Tgf93  | Burundi                    | AY127803 | AY127851 |
|                       | Tgf21  | Kepong, Malaysia           | AY127802 | AY127850 |

**Fungal outgroups**

|                            |          |          |
|----------------------------|----------|----------|
| <i>Lyophyllum semitale</i> | AF223207 | AF357125 |
| <i>Lyophyllum atratum</i>  | AF042582 | AF357129 |
| <i>Tephrocybe rancida</i>  | AF223203 | AF357094 |

COI, cytochrome oxidase subunit 1. Collectors: most samples were collected by the authors. The following fungal herbarium specimens were collected by other people: *T. aurantiacus* (tgf82, Tiina Saarimäki); *T. robustus* (Bart Buyck, BB 5197); *T. microcarpus* (tgf12, R. Watling, March 95 26543); *T. microcarpus* (tgf28, I. Alexander, Jan. 1988, no. 21); *T. letestui* (tgf16, Tiina Saarimäki, Dec. 1991, 1140); *T. titanicus* (Bart Buyck, Nov. 1992, BB4590); *T. clypeatus* (tgf 21, Watling and Turnbull, Watl.26222); *T. clypeatus* (Tgf93, Bart Buyck, BB 6170).
