# Supplementary material
Source: PubMed Central journal article supplement (PMC137514)
Supplement: pnas_222313099_3.pdf [file pnas_222313099_3.pdf]

Supporting information for Aanen *et al.* (2002) *Proc. Natl. Acad. Sci. USA*,  
10.1073/pnas.222313099

**Table 2. Primers used for amplification of partial termite cytochrome  
oxydase subunit 1**

| Primer name | Primer sequence (5'→ 3') |
|-------------|--------------------------|
| Bl-L-1960   | TGATCAAATCTATAATGTTATTGT |
| Bl-H-2653   | TCCTACAGTAAATATATGATGAG  |
| BL1834      | TCAACAAATCATAAAGATATTGG  |
| TH2472      | AATAGGTGTTGGTATAGGAT     |
| TL2350      | CCMCTRTTYGTATGATCAGT     |
| TH2877      | GTRTCRTGTARTACRATGTC     |
| TL1862      | TACTTCGTATTCGGAGCTTGA    |
| TH2397      | GTTAGTAGTATTGTGATTGCTCC  |
| TL2341      | CGAACGAATCCCACTATTTGT    |
| TH2928      | AATACTGCTCCTATAGATAG     |
