# Supplementary material
Source: PubMed Central journal article supplement (PMC137514)

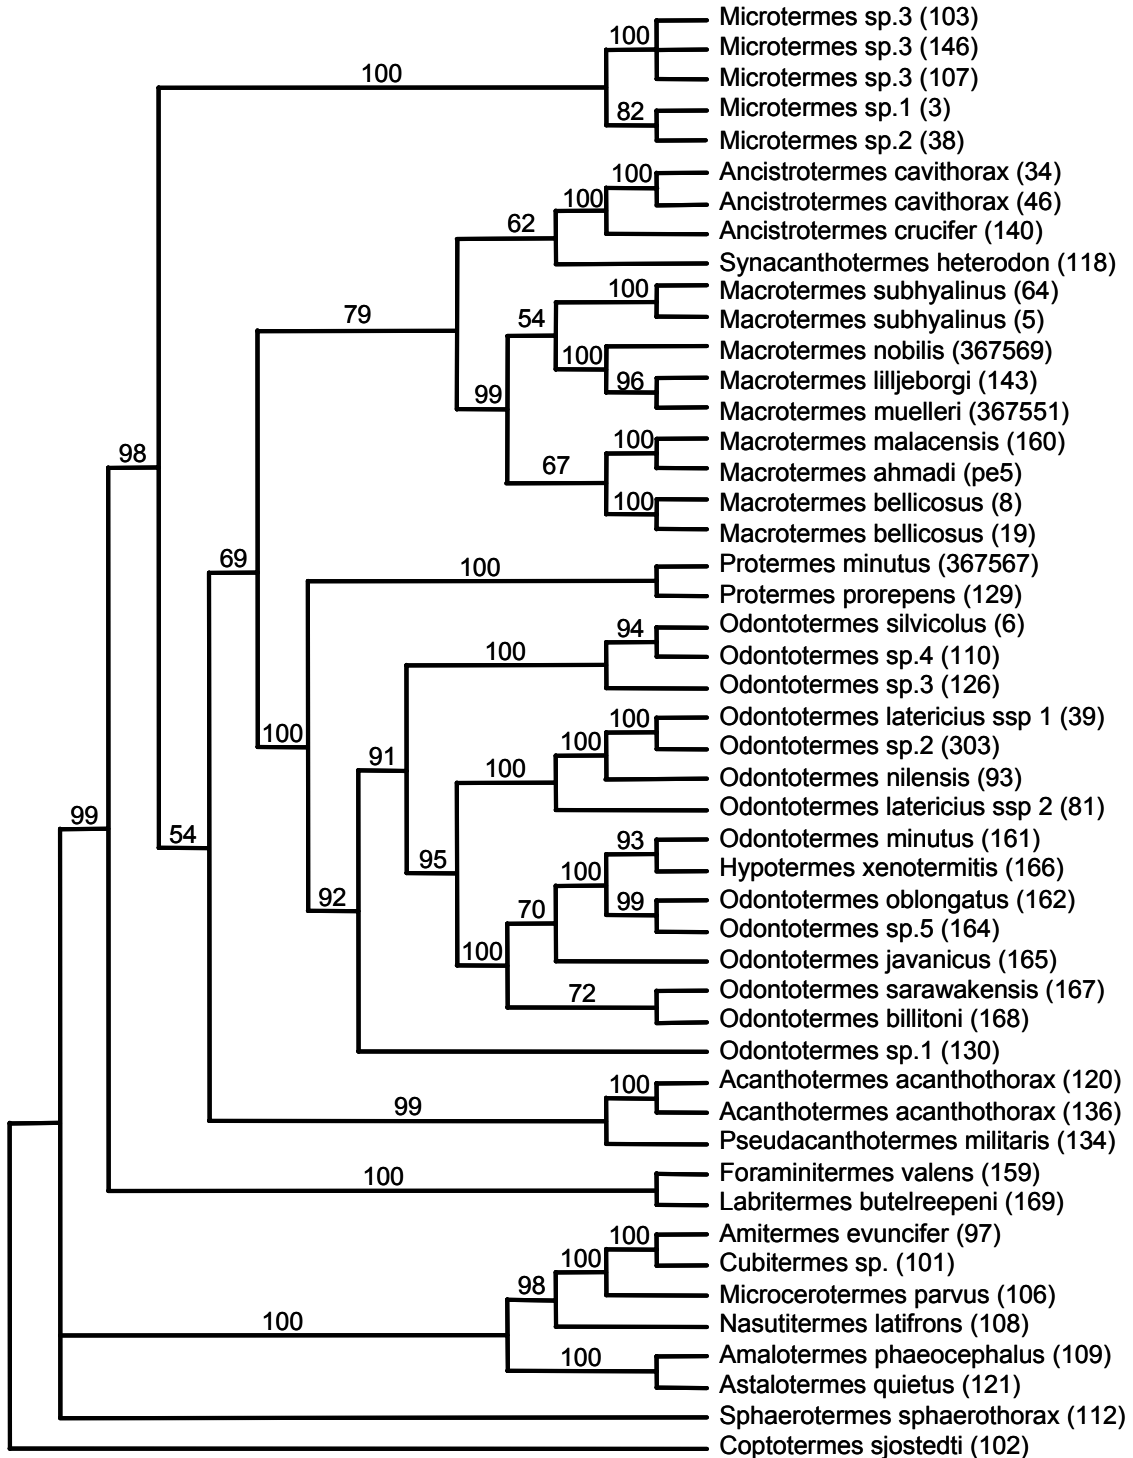

Supplement: pnas_222313099_14.pdf [file pnas_222313099_14.pdf]

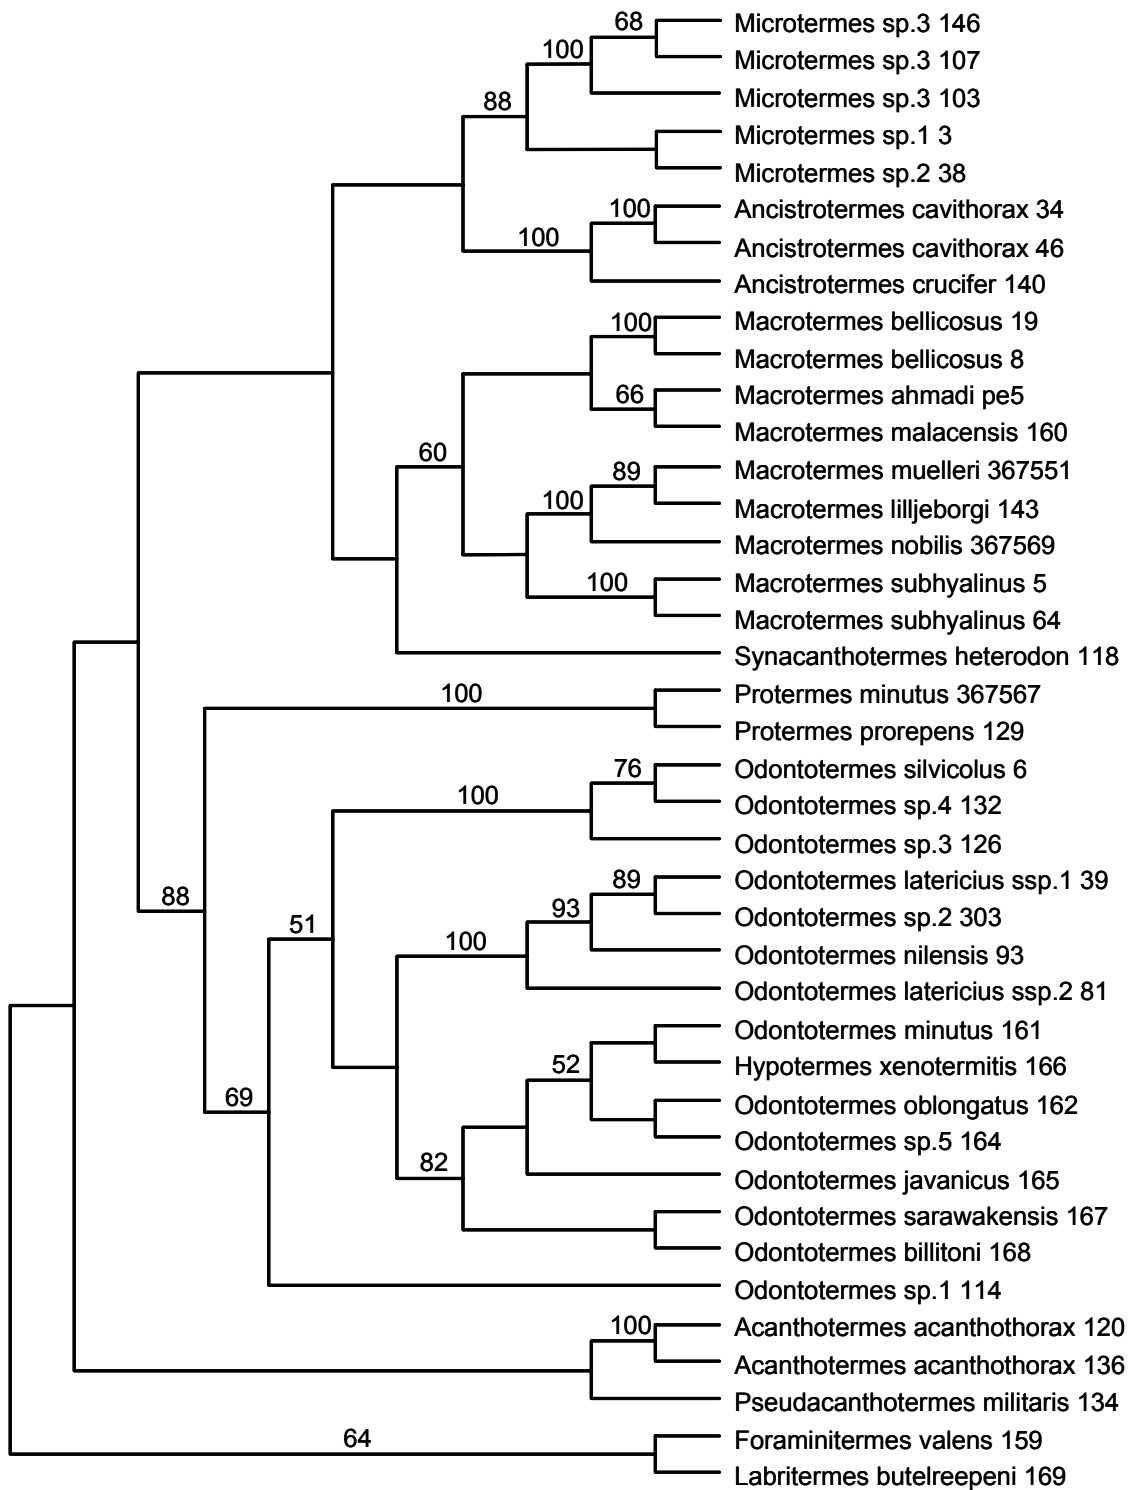

Supplement: pnas_222313099_16.pdf [file pnas_222313099_16.pdf]

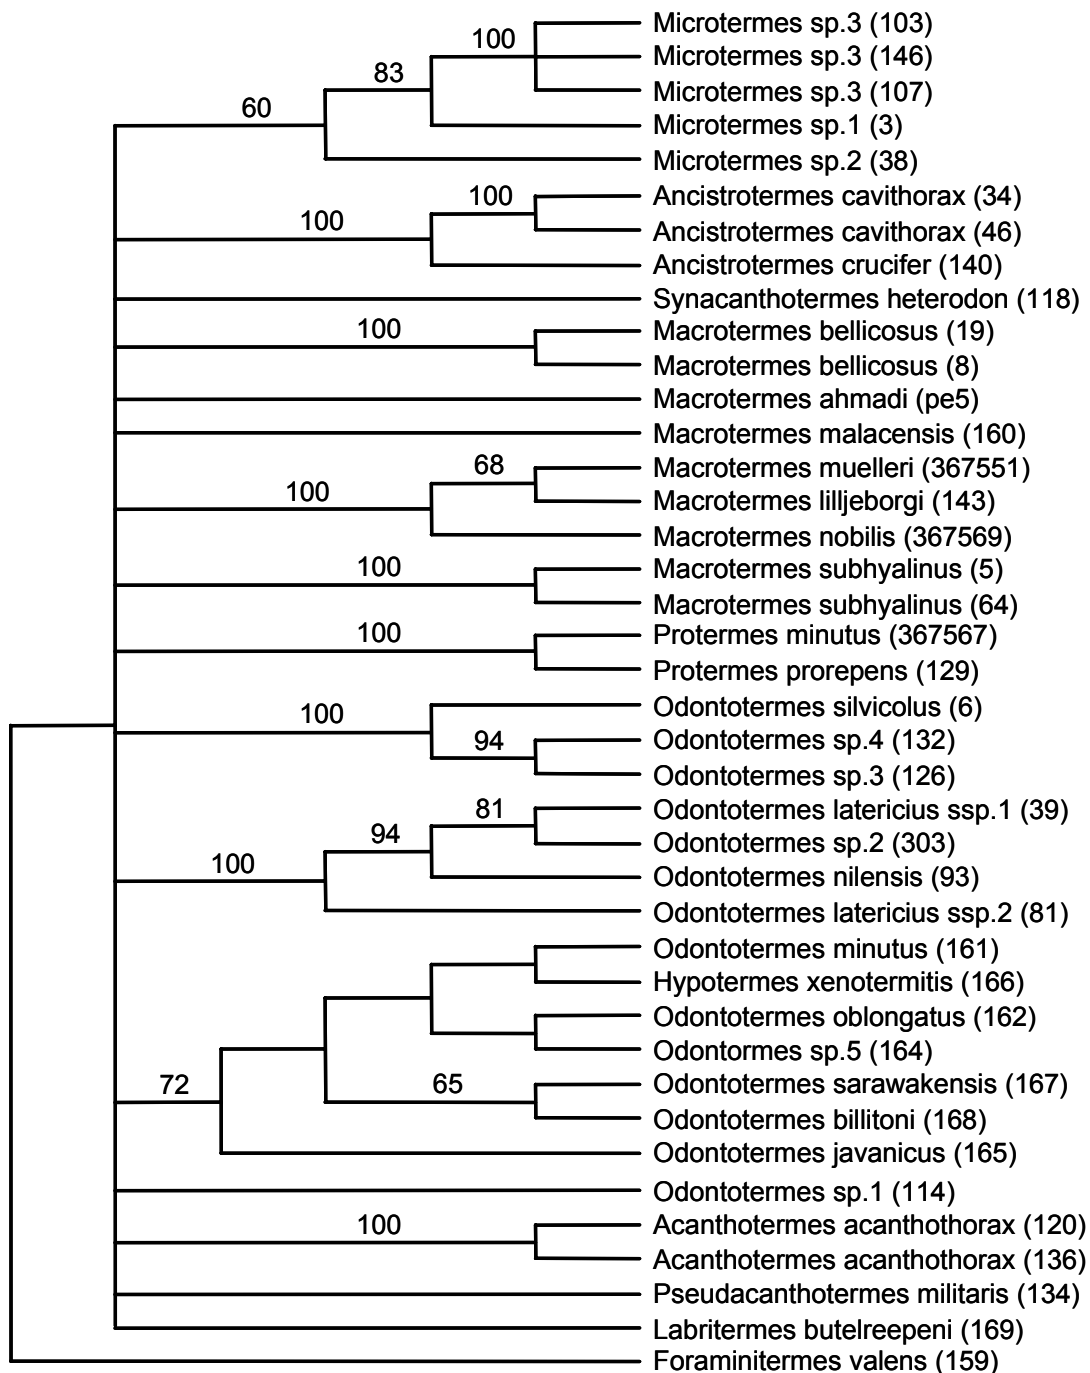

Supplement: pnas_222313099_17.pdf [file pnas_222313099_17.pdf]

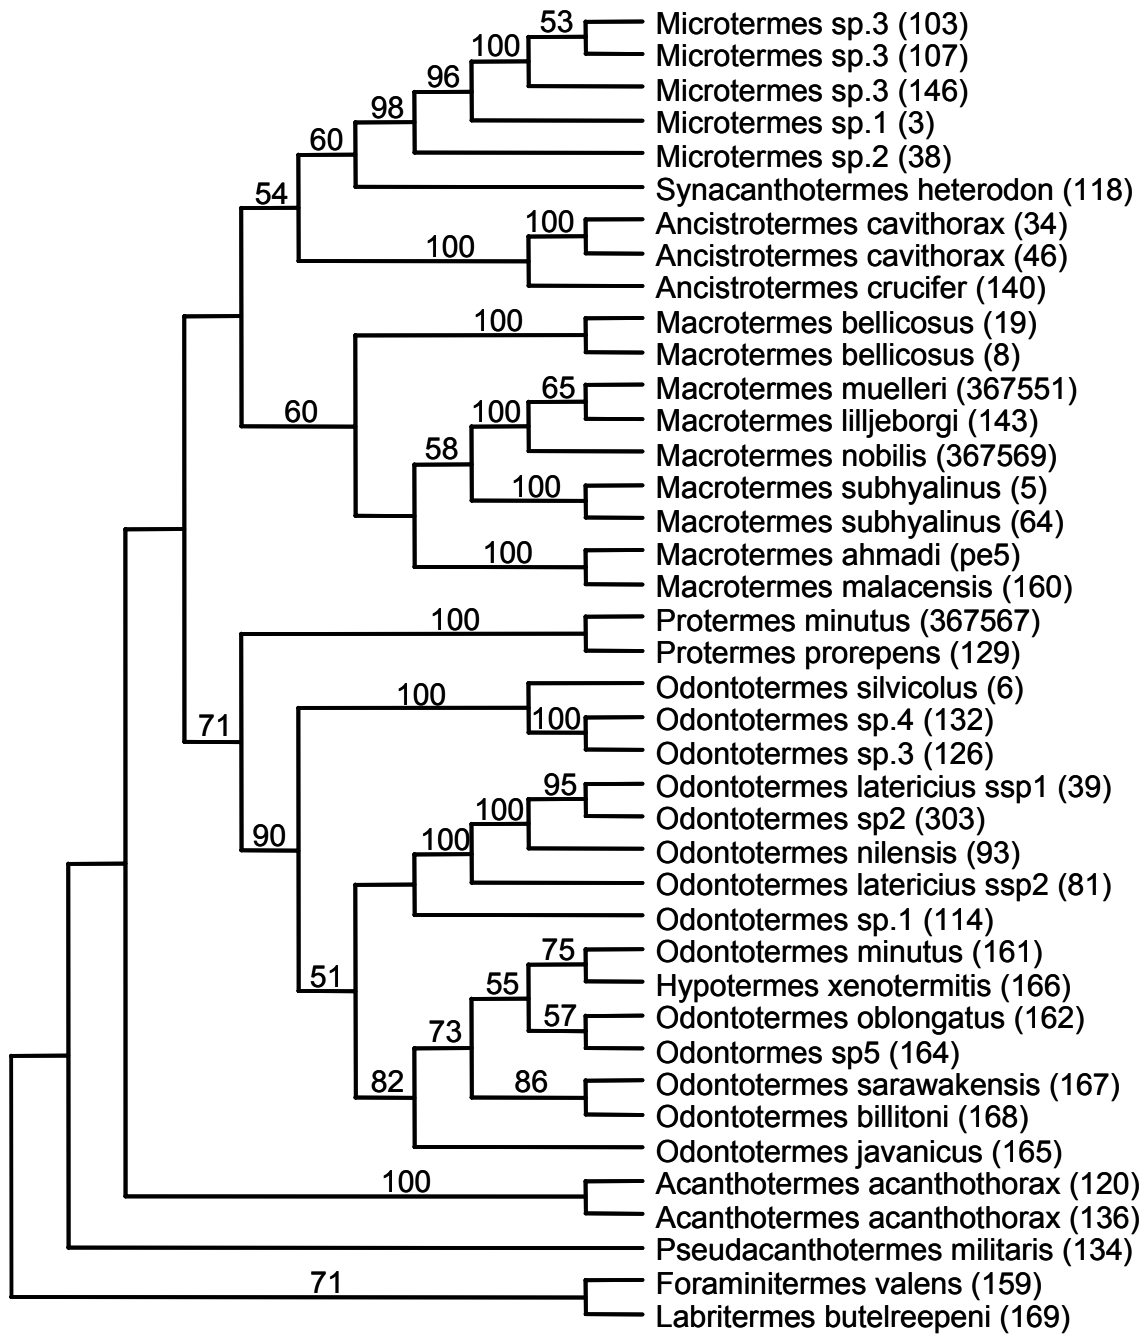

Supplement: pnas_222313099_18.pdf [file pnas_222313099_18.pdf]

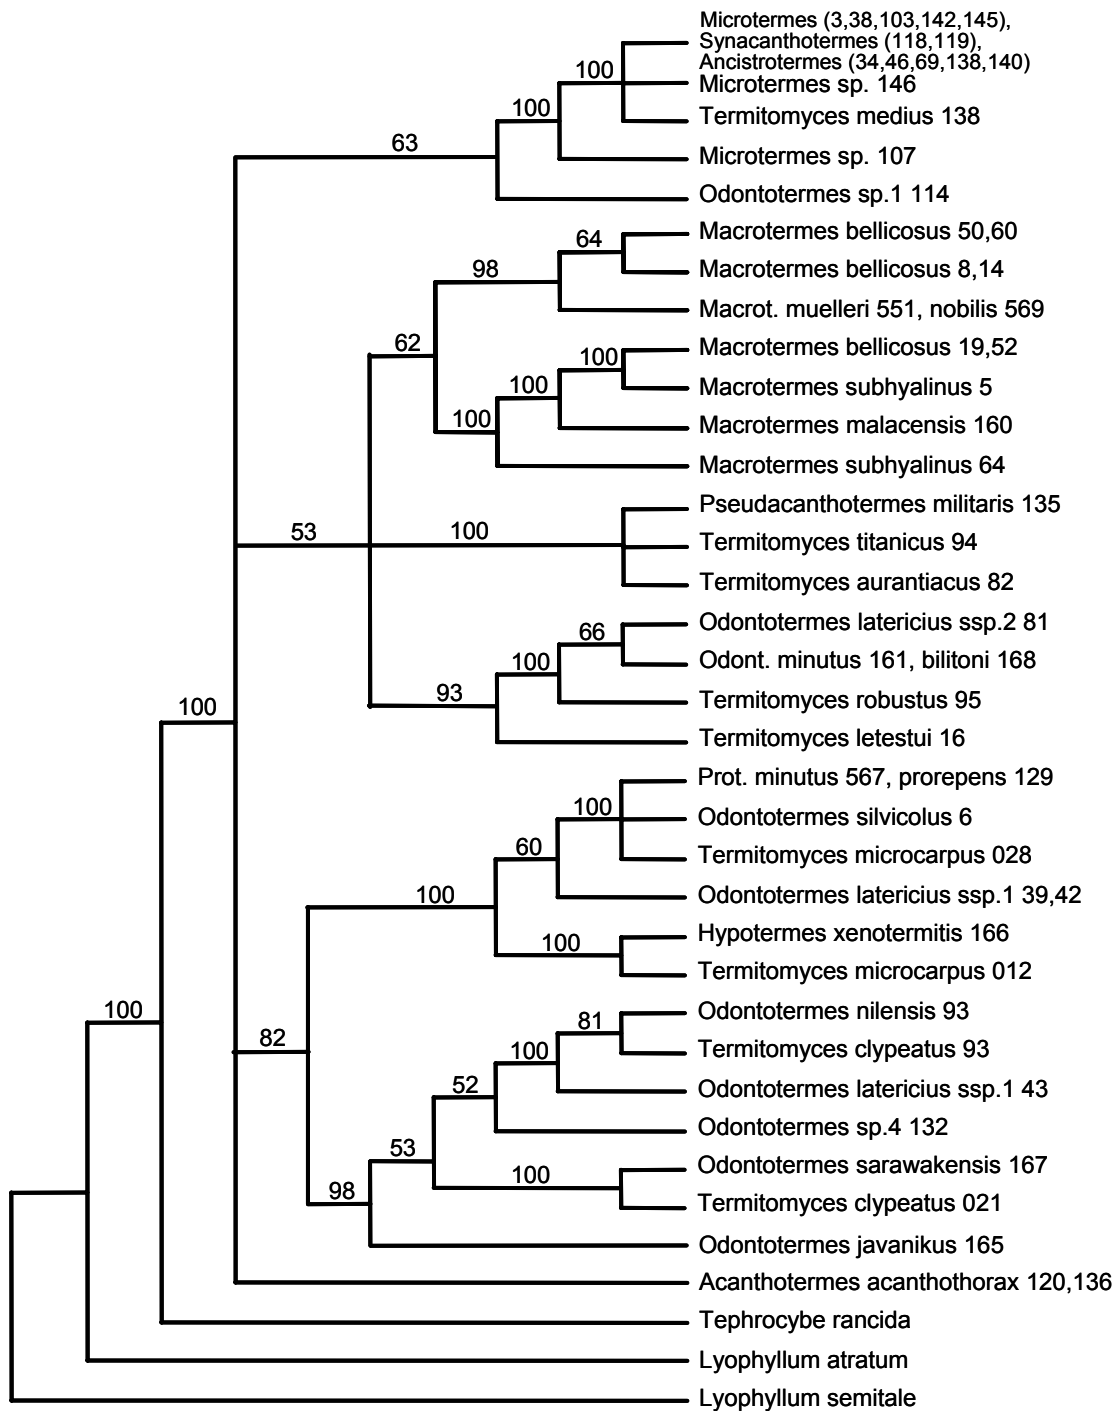

Supplement: pnas_222313099_19.pdf [file pnas_222313099_19.pdf]

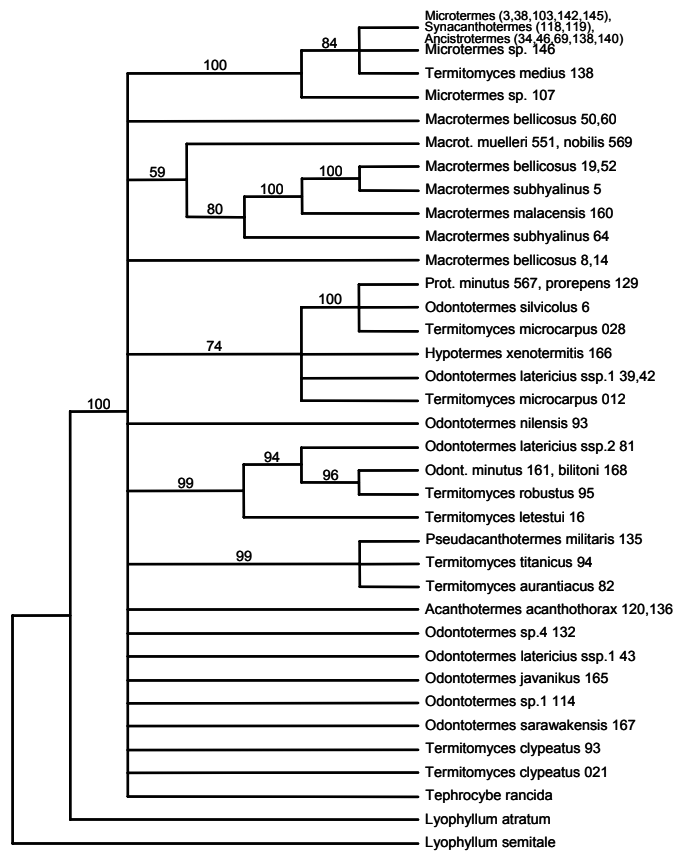

Supplement: pnas_222313099_20.pdf [file pnas_222313099_20.pdf]

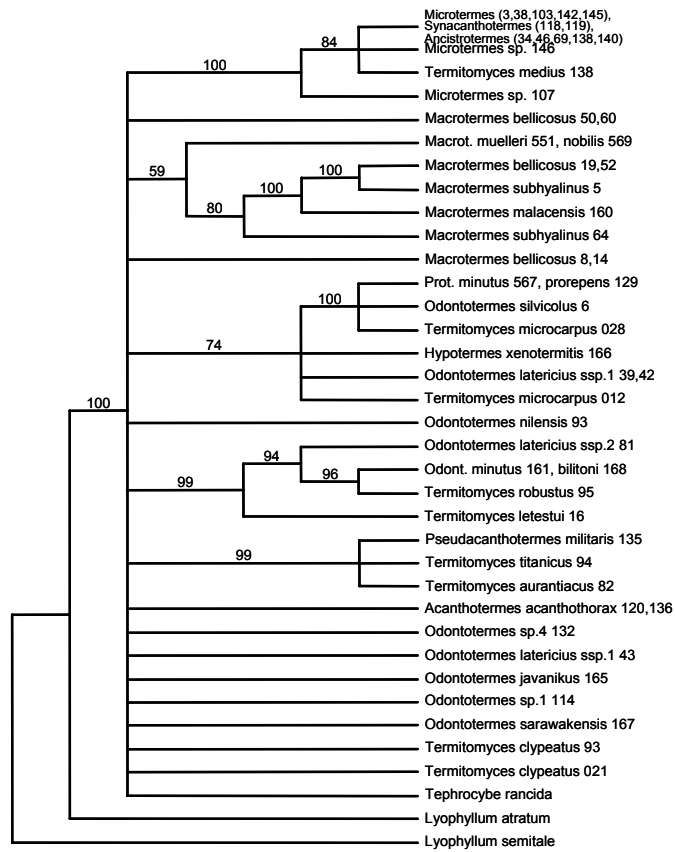

Supplement: pnas_222313099_21.pdf [file pnas_222313099_21.pdf]

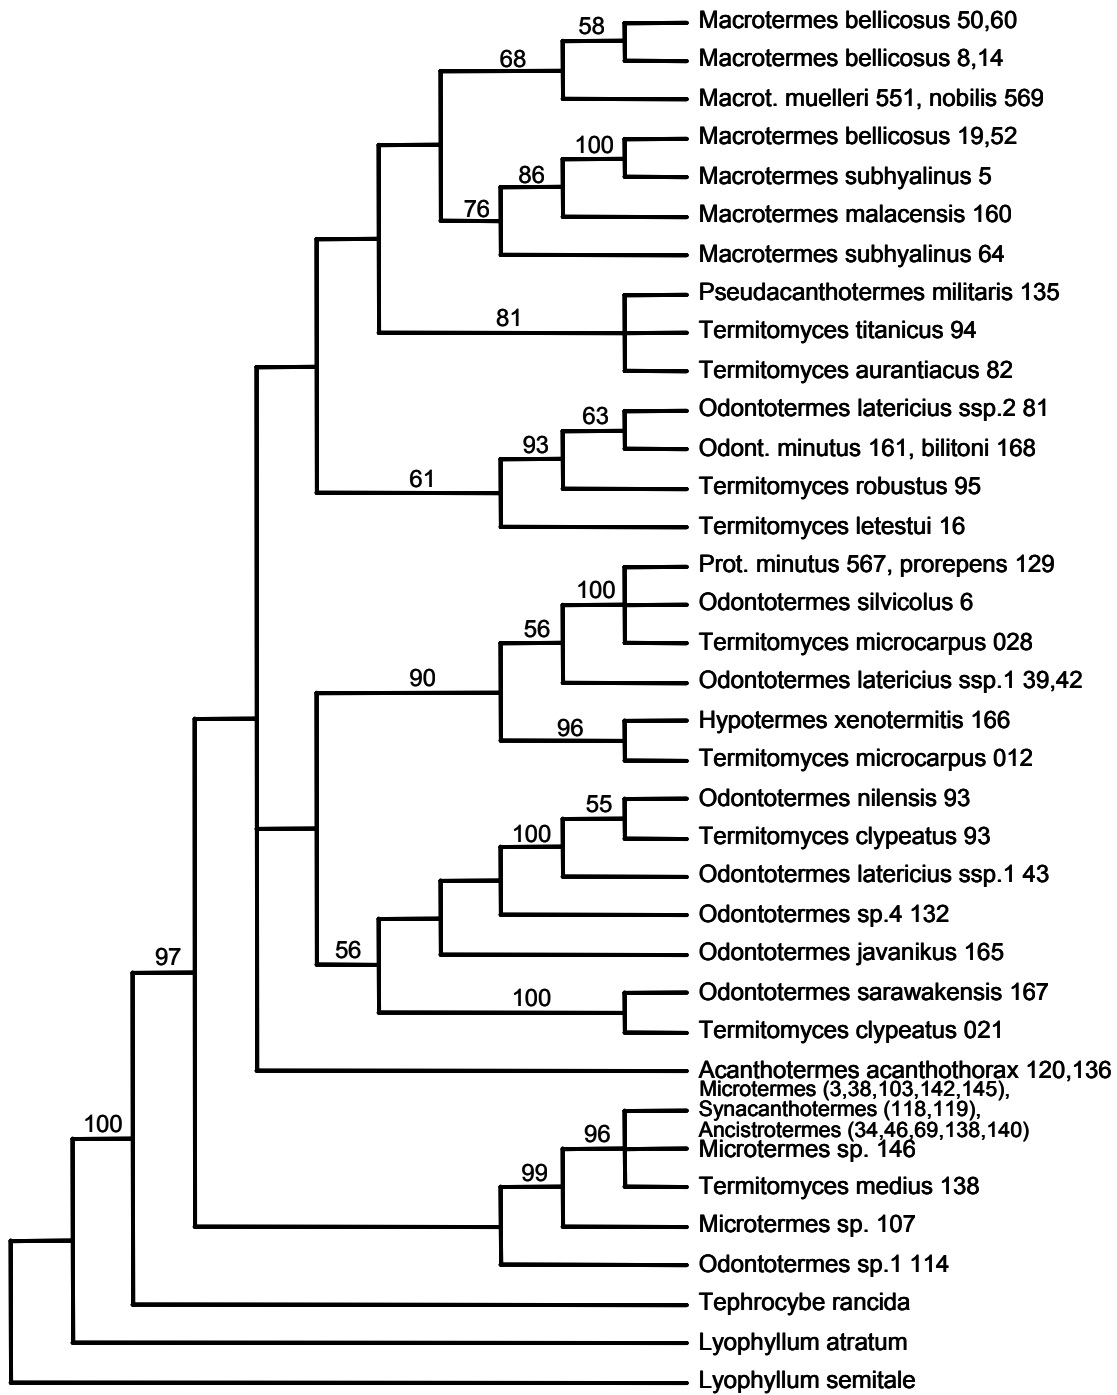

Supplement: pnas_222313099_22.pdf [file pnas_222313099_22.pdf]

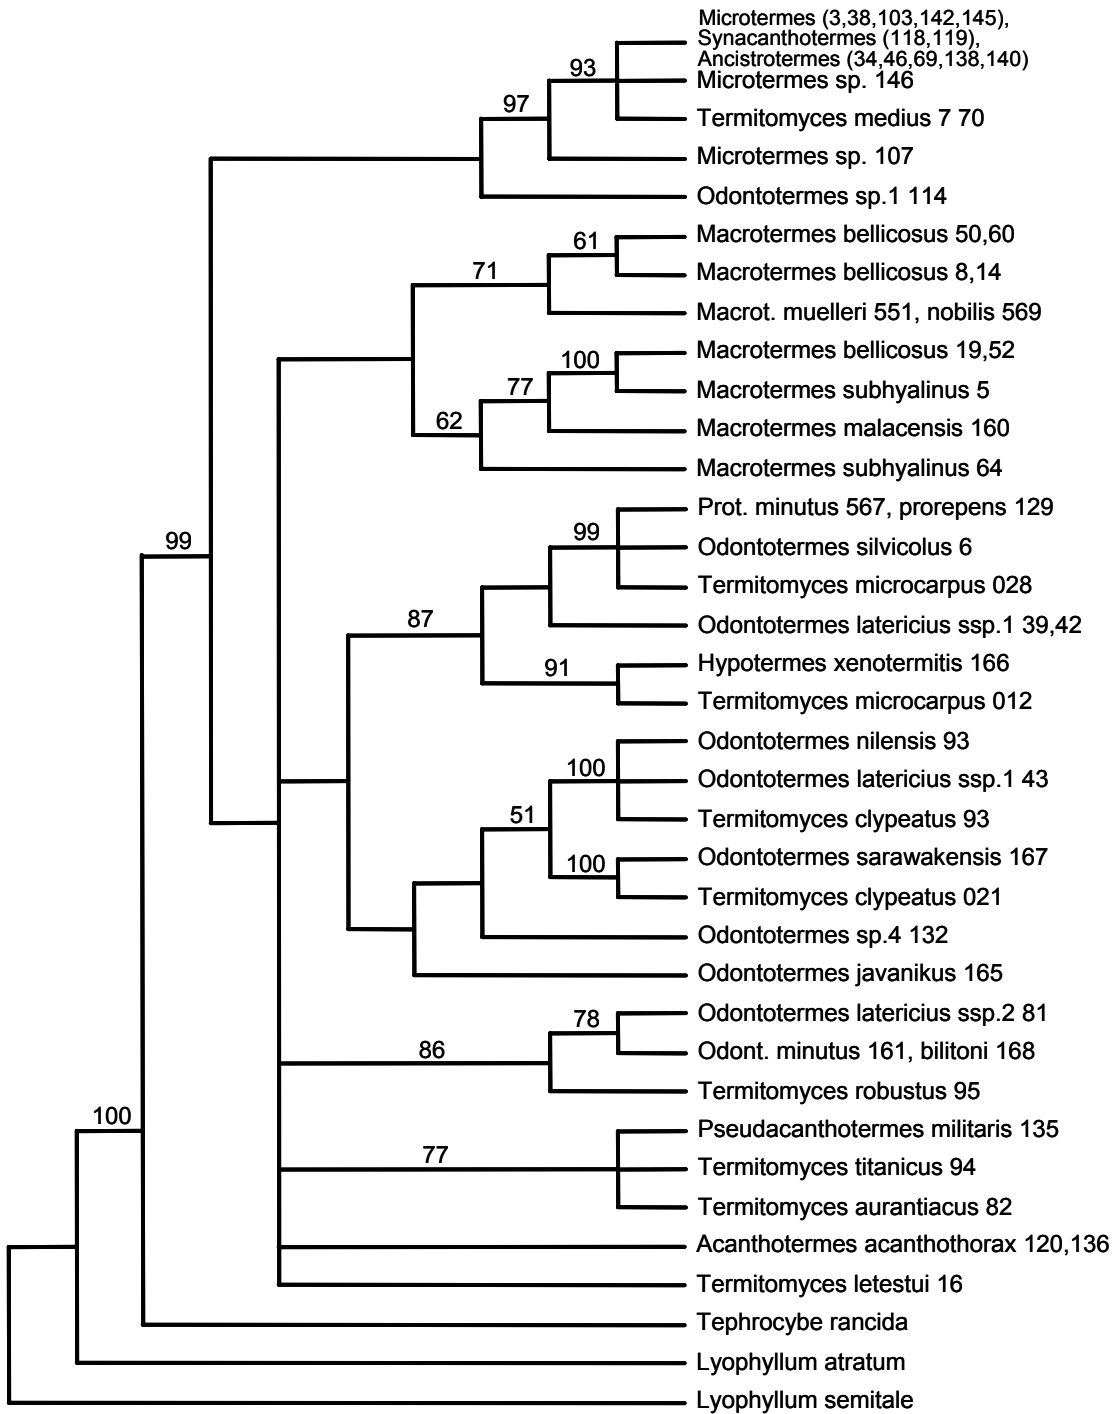

Supplement: pnas_222313099_23.pdf [file pnas_222313099_23.pdf]
